# Supplementary material for: Rab7 regulates primary cilia disassembly through cilia excision
Source: PubMed Central journal article supplement — J Cell Biol. 2019 Oct 16;218(12):4030–41. doi: 10.1083/jcb.201811136 (PMC6891077; doi:10.1083/jcb.201811136), 2019-10-16
Supplement: JCB_201811136_sm.pdf [file JCB_201811136_sm.pdf]

## Supplemental material

Wang et al., <https://doi.org/10.1083/jcb.201811136>

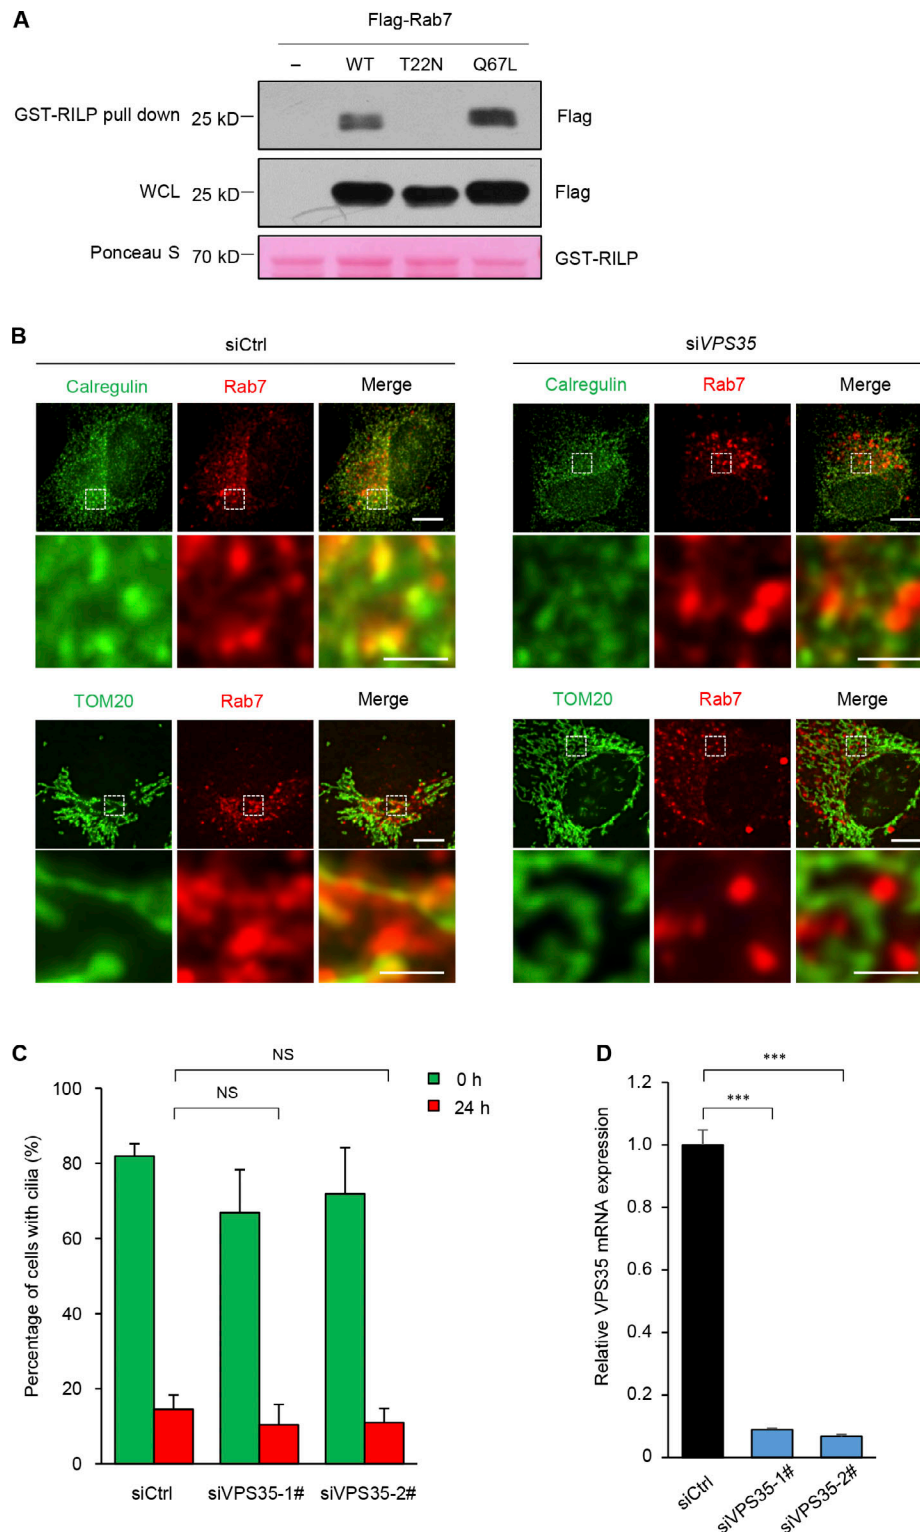

Figure S1. **The activity of Rab7 is required for the proper maintenance of ciliogenesis.** (A) Determination of the activity of Rab7 constructs. Different Rab7 proteins were expressed in HEK293T cells, and the corresponding cell lysates were incubated with GST-RILP beads for 1 h, followed by detection of proteins attached to the beads by Western blotting with the indicated antibodies and Ponceau S staining. WCL, whole cell lysis. (B) VPS35 knockdown inhibits Rab7 localization on ER and mitochondria membranes. Control cells and VPS35 knocked-down cells were co-stained for endogenous Rab7 (red) and endogenous ER marker (Calregulin, green, upper panels) or for endogenous Rab7 (red) and endogenous mitochondria marker (TOM20, green, lower panels). Scale bars, 10  $\mu$ m (main image) and 2  $\mu$ m (magnified regions). (C) RPE-1 cells transfected with the indicated siRNAs were subjected to cilia disassembly assay. The percentage of cells with primary cilia was quantified. Data are means  $\pm$  SD of three independent experiments. Student's *t* test was performed. From left to right, cell *n* = 185, 182; 174, 182; and 164, 180. (D) Quantitative real-time PCR assay for VPS35 gene expression performed on RPE-1 cells transfected with the indicated siRNAs. Data are means  $\pm$  SD of three independent experiments. Student's *t* test was performed. \*\*\**P* < 0.001.

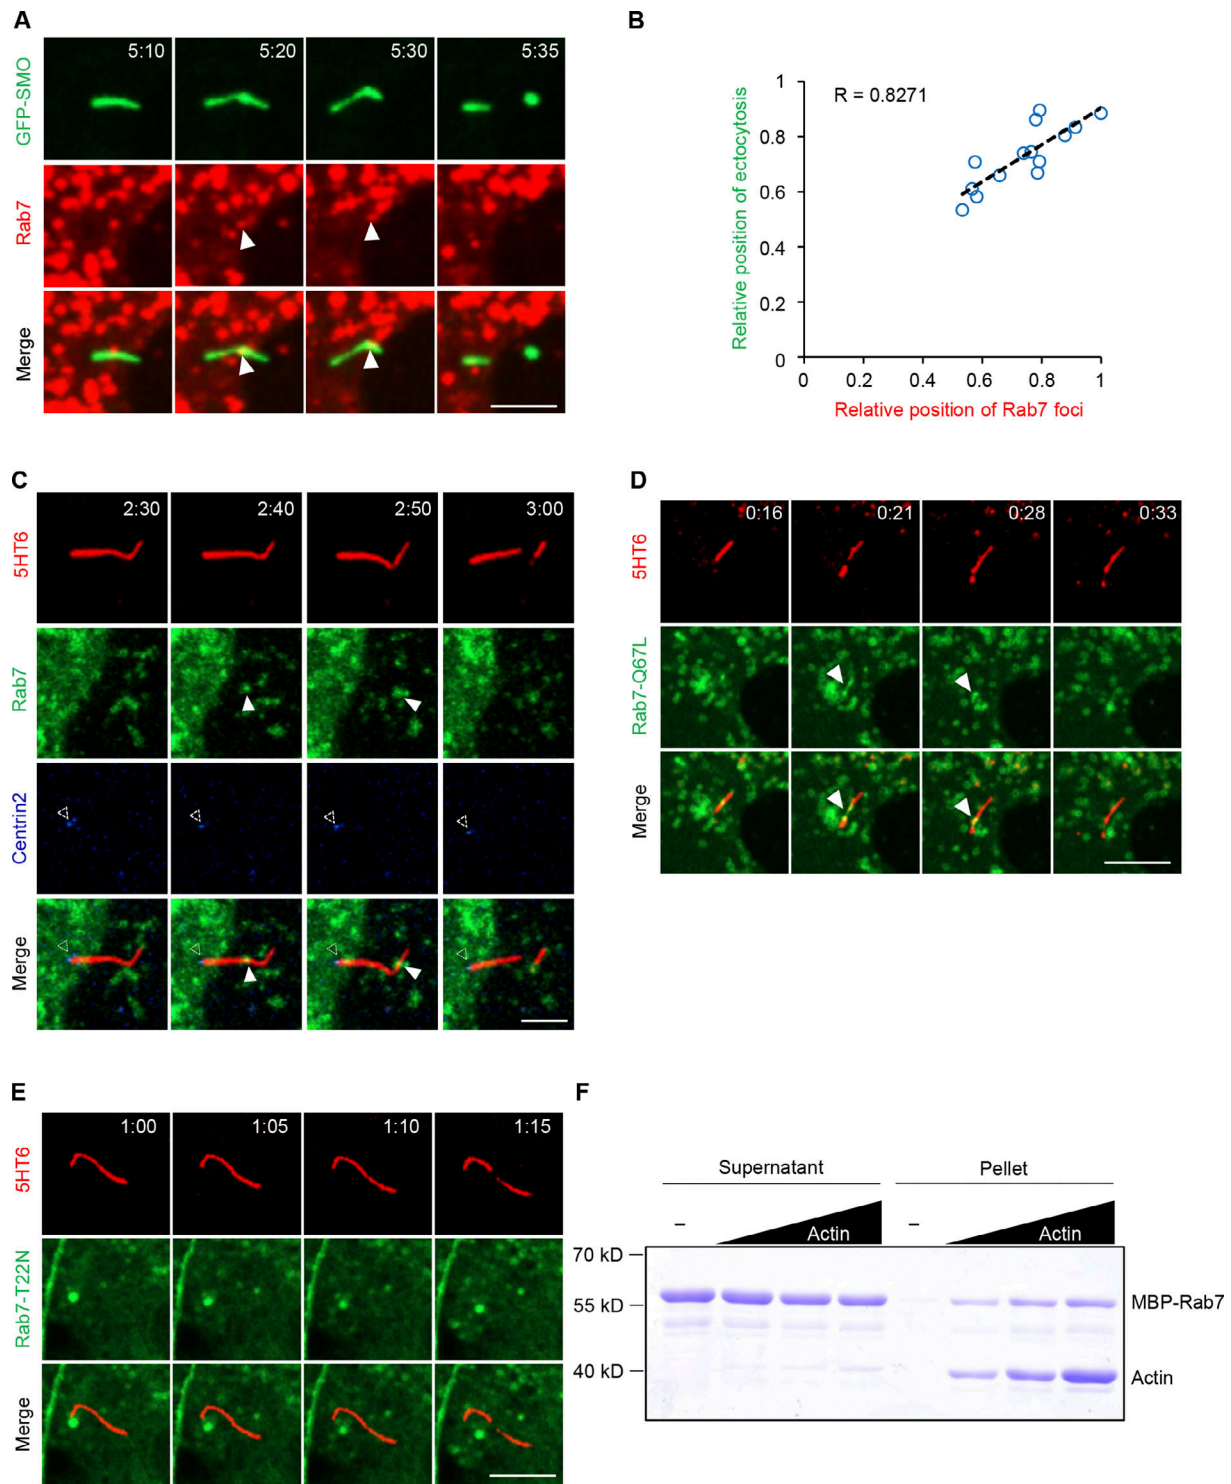

**Figure S2. Rab7 localization during cilia ectocytosis. (A)** Rab7 localization during cilia ectocytosis. Time-lapse images of RPE-1 cells expressing GFP-SMO and mCherry-Rab7 during serum restimulation. Arrowheads mark mCherry-Rab7 foci at the site of cilia excision. Time is in hour:minute. Scale bar, 5  $\mu$ m. **(B)** Correlation plot of the intraciliary Rab7 position with position of excision, each provided as a relative ratio of cilia length. The position of Rab7 was measured at the estimated centroid position of mCherry-Rab7 foci at excision. Linear regression is indicated by the dashed line, with the Pearson correlation coefficient  $R$  value indicated.  $n = 14$  cells from three independent experiments. **(C)** Rab7 localization during cilia ectocytosis. Time-lapse images of RPE-1 cells expressing 5HT6-mCherry, GFP-Rab7, and BFP-Centrin2 during serum restimulation. Solid arrowheads mark Rab7 foci at the site of cilia excision, and open arrowheads mark the base of cilia (centrosome). Time is in hour:minute. Scale bar, 5  $\mu$ m. **(D and E)** Rab7-Q67L and Rab7-T22N localization during cilia ectocytosis. Time-lapse images of RPE-1 cells expressing 5HT6-mCherry and GFP-Rab7 mutants during serum restimulation. Arrowheads mark Rab7 mutant foci at the site of cilia excision. Time is in hour:minute. Scale bars, 10  $\mu$ m. **(F)** Rab7 binds to F-actin in a dose-dependent fashion. Purified MBP-tagged Rab7 protein was incubated with 0, 2, 4, and 8  $\mu$ M polymerized F-actin filaments and subjected to ultracentrifugation. Equal amounts of supernatant or pellet were subjected to SDS-PAGE, followed by Coomassie blue staining.

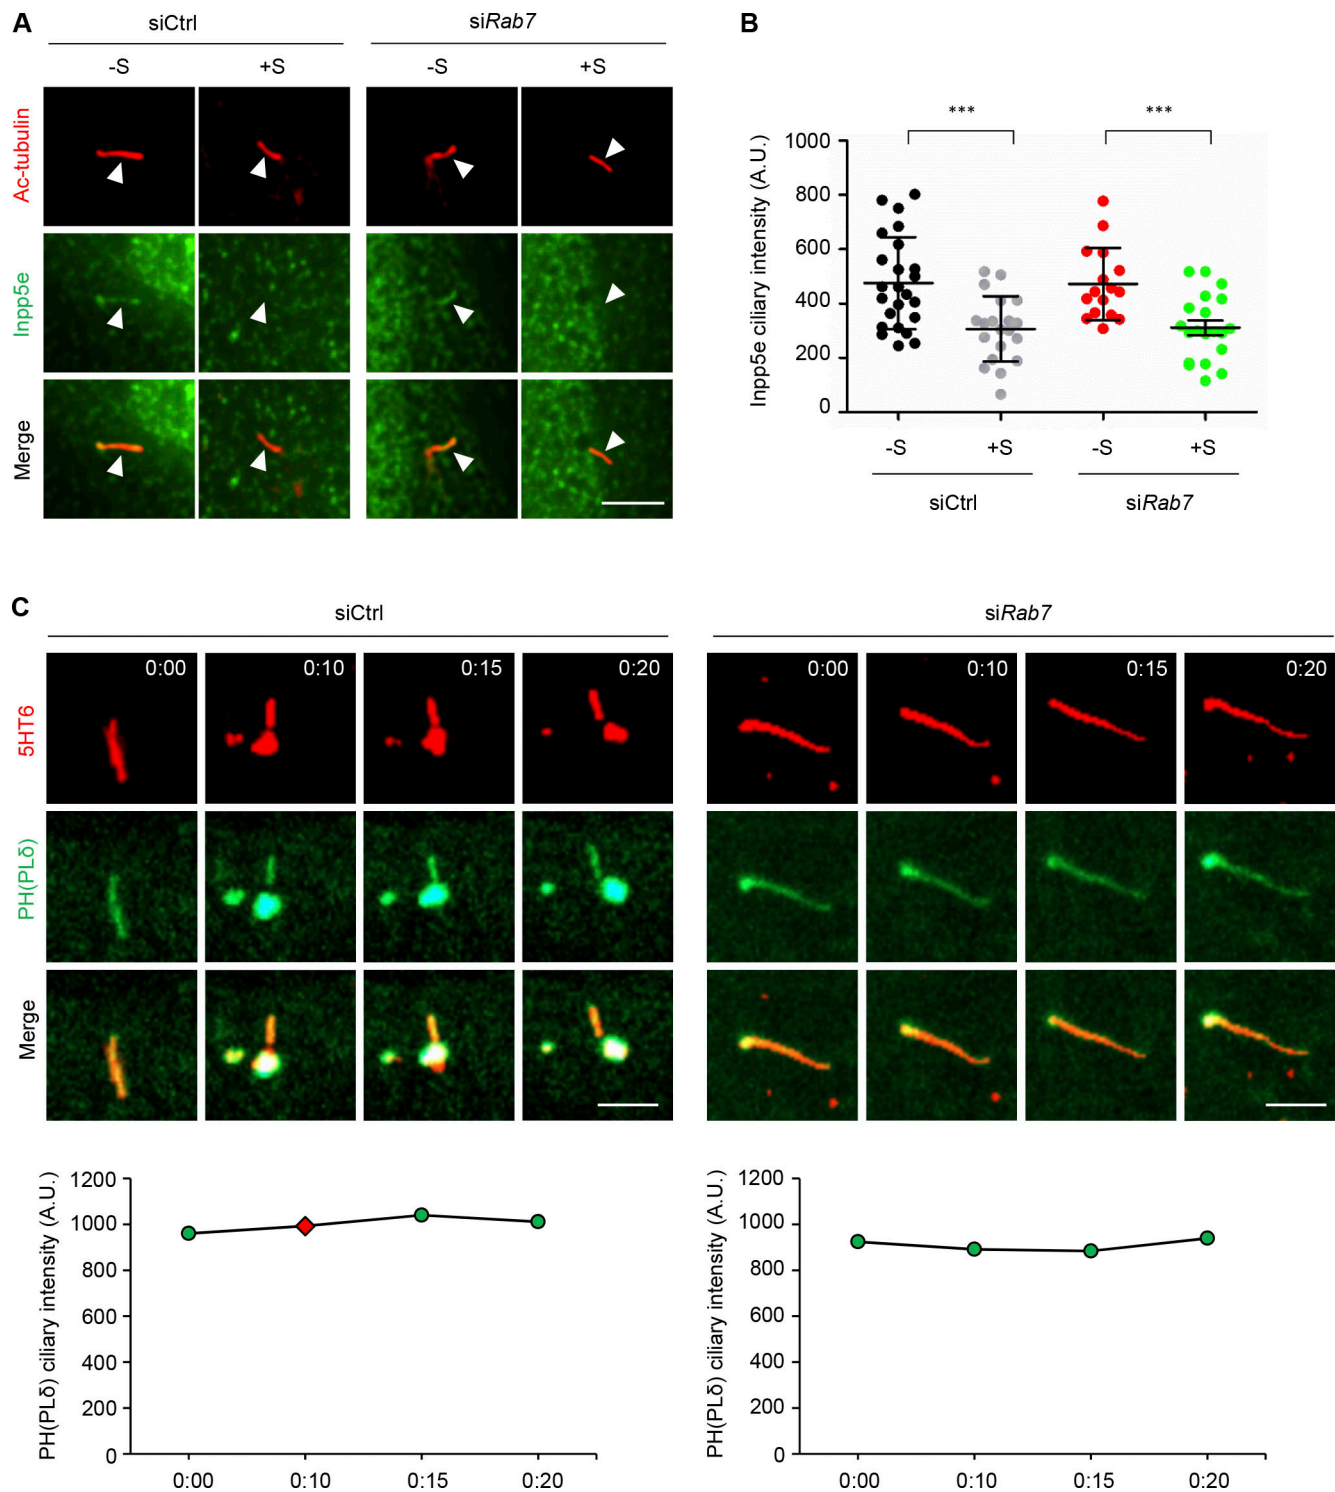

Figure S3. **Depletion of Rab7 does not affect ciliary Inpp5e and PI(4,5)P2 distribution during serum stimulation.** (A) Acetylated  $\alpha$ -tubulin/Inpp5e immunofluorescence of cells treated with 0% FBS (-S) or 10% FBS (+S) for 4 h. Images of each wavelength are scaled to the same intensity range. Arrowheads mark cilia positions. Scale bar, 5  $\mu$ m. (B) Inpp5e immunofluorescence signal intensity measurements in primary cilia (cilia background), as in A. Data are means  $\pm$  SD. Student's *t* test was performed. \*\*\**P* < 0.001. *n* = 24, 20, 16, and 20 cells, respectively. (C) Time-lapse images of the siCtrl or siRab7 cells expressing 5HT6-mCherry and GFP-PH(PLC $\delta$ ) (a PI(4,5)P2 sensor) after serum stimulation for 6 h. Time is in hour:minute. Scale bars, 5  $\mu$ m. PH(PLC $\delta$ ) immunofluorescence signal intensity in the representative images was measured in primary cilia (cilia background [excluding released vesicles in control cells]) in the bottom panels. Red diamond in the control cell marks cilia ectocytosis time point. Data is shown as the representative result from three independent experiments.
